# Supplementary material for: Cellulose Synthase in Atacama Cyanobacteria and Bioethanol Production from Their Exopolysaccharides
Source: MDPI journal article supplement (doi:10.3390/microorganisms11112668), 2023-10-30
Supplement: s1 [file s1]

**Table S1.** Alignment of the consensus sequence from cyanobacterial strain LLA-10. The nucleotides consensus sequence (1500 bp) and translated consensus aminoacid sequence (483 aa) were used as query in the blastn, blastx, tblastx, tblastp and tblastn alignments programs of NCBI. The table shows identity percentage, organisms and names for gene or proteins found with identity between 76–99%.

|         | Query   | Alignment  | E-value | Query cover | Percent Identity | Organisms                            | Nº of access in GenBank | Description of the gene or protein   |
|---------|---------|------------|---------|-------------|------------------|--------------------------------------|-------------------------|--------------------------------------|
| blastn  | 1500 pb | Nucleotide | 0.0     | 99%         | 76,13%–77,05%    | Calothrix sp. NIES-2100              | AP018178.1              | Cellulose synthase                   |
|         |         |            |         |             |                  | Nostoc carneum NIES-2107             | AP018180.1              | Cellulose synthase                   |
|         |         |            |         |             |                  | Anabaena sp. WA102                   | CP011456.1              | Cellulose synthase                   |
|         |         |            |         |             |                  | Dolichospermum sp. DET69             | CP070233.1              | Glycosyl transferase                 |
|         |         |            |         |             |                  | Aphanizomenon flos-aquae DEX18       | CP051188.1              | Glycosyl transferase                 |
|         |         |            |         |             |                  | Nostoc linckia NIES-25               | AP018223.1              | Cellulose synthase                   |
| blastx  | 1500 pb | Nucleotide | 0.0     | 99%         | 81,04%–99,79%    | Nostoc minutum NIES-26               | RCJ36521.1              | Cellulose synthase                   |
|         |         |            |         |             |                  | Unclassified Nodularia               | WP_194001580            | Glycosyl transferase                 |
|         |         |            |         |             |                  | Nostocales cyanobacterium LEGE 11386 | MBE9051224.1            | Glycosyl transferase                 |
|         |         |            |         |             |                  | Nodularia sp. NIES-3585              | WP_089091285.1          | Glycosyl transferase                 |
|         |         |            |         |             |                  | Nostoc sp. ATCC 43529                | RCJ19960.1              | Cellulose synthase                   |
|         |         |            |         |             |                  | Nostoc sp. FACHB-973                 | WP_190883645.1          | Glycosyl transferase                 |
| tblastx | 1500 pb | Nucleotide | 0.0     | 96%–99%     | 84,94%–86,32%    | Nostoc sp. NIES-2111                 | AP018184.1              | Cellulose synthase catalytic subunit |
|         |         |            |         |             |                  | Calothrix sp. NIES-2100              | AP018178.1              | Cellulose synthase                   |
|         |         |            |         |             |                  | Calothrix sp. NIES-2098              | AP018172.1              | Cellulose synthase catalytic subunit |
|         |         |            |         |             |                  | Nostoc sp. NIES-3756                 | AP017295.1              | Cellulose synthase catalytic subunit |
|         |         |            |         |             |                  | Nostoc linckia NIES-25               | AP018223.1              | Cellulose synthase                   |
|         |         |            |         |             |                  | Nostoc sp. C052                      | CP040272.1              | Glycosyl transferase                 |
| blastp  | 483aa   | Protein    | 0.0     | 96%–99%     | 81,04%–99,79%    | Cyanocohniella sp. LLY               | MCG6133374              | Glycosyl transferase                 |
|         |         |            |         |             |                  | Unclassified Nodularia               | WP_194001580            | Glycosyl transferase                 |
|         |         |            |         |             |                  | Nostocales cyanobacterium LEGE 11386 | MBE9051224.1            | Glycosyl transferase                 |
|         |         |            |         |             |                  | Nodularia sp. NIES-3585              | WP_089091285.1          | Glycosyl transferase                 |
|         |         |            |         |             |                  | Nostoc sp. FACHB-973                 | WP_190883645.1          | Glycosyl transferase                 |
|         |         |            |         |             |                  | Nostoc sp. ATCC 43529                | RCJ19960.1              | Cellulose synthase                   |
| tblastn | 483aa   | Protein    | 0.0     | 99%–100%    | 78,44%–80,21%    | Nostoc sp. NIES-3756                 | AP017295.1              | Cellulose synthase catalytic subunit |
|         |         |            |         |             |                  | Nostoc sp. NIES-2111                 | AP018184.1              | Cellulose synthase catalytic subunit |
|         |         |            |         |             |                  | Calothrix sp. NIES-2098              | AP018172.1              | Cellulose synthase catalytic subunit |
|         |         |            |         |             |                  | Nostoc linckia NIES-25               | AP018223.1              | Cellulose synthase                   |
|         |         |            |         |             |                  | Calothrix sp. NIES-2100              | AP018178.1              | Cellulose synthase                   |
|         |         |            |         |             |                  | Nostoc sp. C052                      | CP040272.1              | Glycosyl transferase                 |
